# Supplementary material for: Ultrathin Pt3Pb nanowires prepared in the aqueous phase for enhanced methanol electrooxidation
Source: Royal Society of Chemistry journal article supplement (doi:10.1039/d3nj01461d), 2023-01-01
Supplement: d3nj01461d1.pdf [file d3nj01461d1.pdf]

## Ultrathin Pt<sub>3</sub>Pb nanowires prepared in aqueous phase for enhanced methanol electrooxidation

Yaming Liu,<sup>\*a,b</sup> Meng Wu,<sup>a</sup> Shanxiang Sheng,<sup>a</sup> Yongzhen Wang,<sup>a,b</sup> Chao Zhi,<sup>a,b</sup>

Jianguang Meng,<sup>a,b</sup> and Xiang Li<sup>c</sup>

<sup>a</sup> School of Textile Science and Engineering, Xi'an Polytechnic University, Xi'an, Shaanxi 710048, China.

<sup>b</sup> Key Laboratory of Functional Textile Material and Product, Xi'an Polytechnic University, Ministry of Education, Xi'an 710048, China.

<sup>c</sup> Shaanxi Key Laboratory of Optoelectronic Functional Materials and Devices, School of Materials Science and Chemical Engineering, Xi'an Technological University, Xi'an, Shaanxi 710021, China

\*Address correspondence to: [liuym2020@xpu.edu.cn](mailto:liuym2020@xpu.edu.cn)

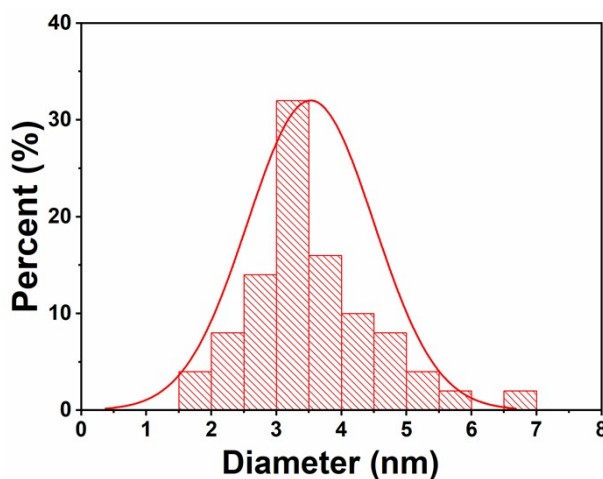

Figure S1. Histogram of the diameter of Pt<sub>3</sub>Pb NWs by measuring about 200 NWs.

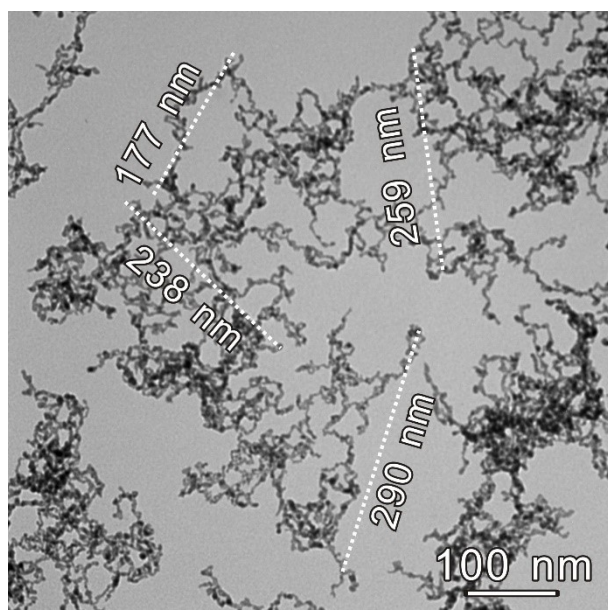

Figure S2. TEM of Pt<sub>3</sub>Pb NWs for qualitatively analyzing of the length of nanowires.

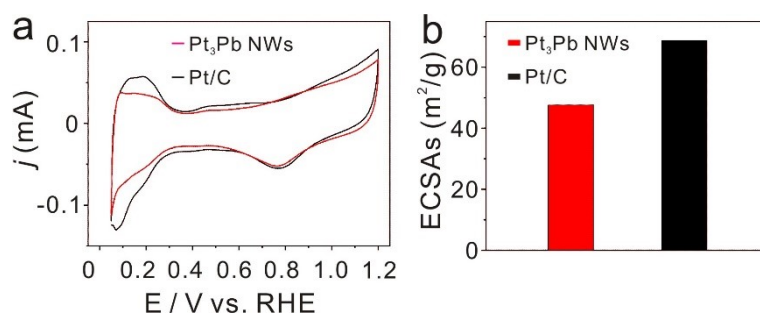

Figure S3. ECSAs of Pt<sub>3</sub>Pb NWs and commercial Pt/C in 0.1 M HClO<sub>4</sub> solution at a sweep rate of 50 mV s<sup>-1</sup>.

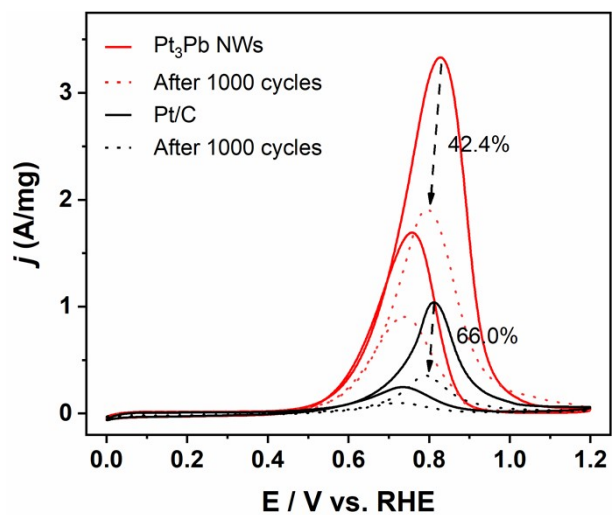

Figure S4. Recycling stability of Pt<sub>3</sub>Pb NWs and Pt/C.

**Table S1.** Metal contents analyzed by ICP-MS.

| Sample                 | Pt (At %) | Pb (At %) |
|------------------------|-----------|-----------|
| Pt <sub>3</sub> Pb NWs | 74.56     | 25.44     |
